# Supplementary material
Source: PubMed Central journal article supplement (PMC2234219)
Supplement: pnas_0709562104_2.pdf [file pnas_0709562104_2.pdf]

**Table 3. Sensitivity analysis of distributed external costs  $C_{ab}$  to the present-value discount rate  $r$**

| Overfishing, 2005 US\$ billions                                |                 |                  |                  |                  |
|----------------------------------------------------------------|-----------------|------------------|------------------|------------------|
|                                                                | NPV rate, %     |                  |                  |                  |
|                                                                | 0               | 1                | 2                | 3                |
| $C_{LL}$                                                       | 0.026 0.059     | 0.032 0.072      | 0.039 0.088      | 0.048 0.11       |
| $C_{LM}$                                                       | 0.046 0.14      | 0.055 0.17       | 0.067 0.210      | 0.082 0.26       |
| $C_{LH}$                                                       | 0.038 0.18      | 0.045 0.22       | 0.054 0.260      | 0.065 0.31       |
| $C_{ML}$                                                       | 0.52 1.6        | 0.62 1.9         | 0.75 2.3         | 0.91 2.7         |
| $C_{MM}$                                                       | 100 320         | 120 400          | 150 490          | 190 610          |
| $C_{MH}$                                                       | 3.8 18          | 4.4 21           | 5.2 25           | 6.2 30           |
| $C_{HL}$                                                       | 1.2 2.4         | 1.5 2.8          | 1.8 3.3          | 2.2 3.9          |
| $C_{HM}$                                                       | 18 58           | 22 70            | 27 84            | 33 100           |
| $C_{HH}$                                                       | 19 90           | 22 110           | 27 130           | 32 150           |
| $C_w$                                                          | <b>140 490</b>  | <b>180 600</b>   | <b>220 740</b>   | <b>270 910</b>   |
| Deforestation, 2005 US\$ billions                              |                 |                  |                  |                  |
|                                                                | NPV rate, %     |                  |                  |                  |
|                                                                | 0               | 1                | 2                | 3                |
| $C_{LL}$                                                       | 58 300          | 64 330           | 71 360           | 79 400           |
| $C_{LM}$                                                       | 0.078 1.3       | 0.086 1.5        | 0.101 1.8        | 0.12 2.1         |
| $C_{ML}$                                                       | 1.2 5.9         | 1.3 6.4          | 1.4 7.0          | 1.5 7.6          |
| $C_{MM}$                                                       | 48 840          | 57 1,000         | 68 1,200         | 82 1,500         |
| $C_{HL}$                                                       | 1.4 7.1         | 1.5 7.8          | 1.7 8.7          | 1.9 9.6          |
| $C_{HM}$                                                       | 3.3 58          | 3.9 69           | 4.6 82           | 5.5 98           |
| $C_H$                                                          | (15)            | (16)             | (17)             | (18)             |
| $C_w$                                                          | <b>97 1,200</b> | <b>110 1,400</b> | <b>130 1,700</b> | <b>150 2,000</b> |
| Mangrove loss, 2005 US\$ billions                              |                 |                  |                  |                  |
|                                                                | NPV rate, %     |                  |                  |                  |
|                                                                | 0               | 1                | 2                | 3                |
| $C_{LL}$                                                       | 7.4             | 8.2              | 9.2              | 10               |
| $C_{LM}$                                                       | 0.055           | 0.061            | 0.068            | 0.076            |
| $C_{LH}$                                                       | 0.0017          | 0.0019           | 0.0021           | 0.0024           |
| $C_{ML}$                                                       | 0.29            | 0.32             | 0.36             | 0.40             |
| $C_{MM}$                                                       | 27              | 30               | 33               | 37               |
| $C_{MH}$                                                       | 0.18            | 0.20             | 0.22             | 0.24             |
| $C_{HL}$                                                       | 6.4             | 7.1              | 7.9              | 8.8              |
| $C_{HM}$                                                       | 21              | 24               | 26               | 29               |
| $C_{HH}$                                                       | 7.4             | 8.3              | 9.2              | 10               |
| $C_w$                                                          | <b>70</b>       | <b>78</b>        | <b>87</b>        | <b>97</b>        |
| Agricultural intensification and expansion, 2005 US\$ billions |                 |                  |                  |                  |

|          | NPV rate, %        |                    |                    |                     |
|----------|--------------------|--------------------|--------------------|---------------------|
|          | 0                  | 1                  | 2                  | 3                   |
| $C_{LL}$ | 360                | 420                | 490                | 580                 |
| $C_{LM}$ | 6.9                | 8.2                | 9.9                | 12                  |
| $C_{LH}$ | 3.3 11             | 4.0 13             | 4.8 16             | 5.9 20              |
| $C_{ML}$ | 2.4                | 2.8                | 3.1                | 3.6                 |
| $C_{MM}$ | 3,800              | 4,500              | 5,400              | 6,600               |
| $C_{MH}$ | 35 120             | 42 140             | 52 180             | 63 210              |
| $C_{HL}$ | 5.1                | 5.9                | 6.8                | 8.0                 |
| $C_{HM}$ | 150                | 180                | 220                | 260                 |
| $C_{HH}$ | 580 2,000          | 710 2,400          | 880 3,000          | 1,100 3,700         |
| $C_W$    | <b>4,900 6,400</b> | <b>5,900 7,700</b> | <b>7,100 9,300</b> | <b>8,600 11,000</b> |

Climate change, 2005 international \$ billions

|          | NPV rate, %            |                        |                        |                        |
|----------|------------------------|------------------------|------------------------|------------------------|
|          | 0                      | 1                      | 2                      | 3                      |
| $C_{LL}$ | (48) 3,100             | (53) 1,500             | (50) 740               | (44) 390               |
| $C_{LM}$ | (2,000) 4,800          | (1,600) 2,300          | (1,300) 1,100          | (1,100) 600            |
| $C_{LH}$ | (260) 2,200            | (210) 1,100            | (180) 640              | (160) 390              |
| $C_{ML}$ | (160) 11,000           | (180) 5,000            | (170) 2,500            | (150) 1,300            |
| $C_{MM}$ | (6,600) 16,000         | (5,400) 7,700          | (4,500) 3,800          | (3,800) 2,000          |
| $C_{MH}$ | (860) 7,300            | (720) 3,800            | (620) 2,100            | (540) 1,300            |
| $C_{HL}$ | (150) 9,900            | (170) 4,700            | (160) 2,300            | (140) 1,200            |
| $C_{HM}$ | (6,200) 15,000         | (5,000) 7,200          | (4,200) 3,600          | (3,600) 1,900          |
| $C_{HH}$ | (810) 6,800            | (680) 3,600            | (580) 2,000            | (510) 1,200            |
| $C_W$    | <b>(17,000) 76,000</b> | <b>(14,000) 37,000</b> | <b>(12,000) 19,000</b> | <b>(10,000) 10,000</b> |

Stratospheric ozone layer depletion, 2005 international \$ billions

|          | NPV rate, %        |                    |                    |                  |
|----------|--------------------|--------------------|--------------------|------------------|
|          | 0                  | 1                  | 2                  | 3                |
| $C_{LL}$ | 2.2 5.0            | 1.1 2.5            | 0.58 1.3           | 0.33 0.73        |
| $C_{LM}$ | 18 34              | 9.5 18             | 5.3 9.8            | 3.2 5.8          |
| $C_{LH}$ | 4 165              | 24 37              | 15 23              | 10 16            |
| $C_{ML}$ | 38 89              | 19 44              | 10 23              | 5.9 13           |
| $C_{MM}$ | 320 610            | 170 310            | 94 170             | 56 100           |
| $C_{MH}$ | 720 1,200          | 420 660            | 260 420            | 180 290          |
| $C_{HL}$ | 94 220             | 48 110             | 25 57              | 15 32            |
| $C_{HM}$ | 800 1,500          | 420 770            | 230 430            | 140 260          |
| $C_{HH}$ | 1,800 2,900        | 1,000 1,600        | 660 1,000          | 460 720          |
| $C_W$    | <b>3,800 6,500</b> | <b>2,100 3,600</b> | <b>1,300 2,200</b> | <b>870 1,400</b> |

Stratospheric ozone depletion, 1,000 DALYs

|          |             |             |           |           |
|----------|-------------|-------------|-----------|-----------|
| $C_{LL}$ | 840 1,700   | 470 930     | 280 540   | 190 340   |
| $C_{LM}$ | 2,100 4,300 | 1,200 2,500 | 780 1,600 | 540 1,100 |

|          |                        |                        |                        |                       |
|----------|------------------------|------------------------|------------------------|-----------------------|
| $C_{LH}$ | 1,700 3,400            | 1,100 2,100            | 720 1,400              | 530 1,000             |
| $C_{ML}$ | 15,000 30,000          | 8,300 16,000           | 5,000 9,600            | 3,300 6,100           |
| $C_{MM}$ | 37,000 76,000          | 22,000 44,000          | 14,000 28,000          | 9,800 19,000          |
| $C_{MH}$ | 30,000 60,000          | 19,000 37,000          | 13,000 25,000          | 9,700 19,000          |
| $C_{HL}$ | 37,000 75,000          | 20,000 41,000          | 12,000 24,000          | 8,200 15,000          |
| $C_{HM}$ | 92,000 190,000         | 54,000 110,000         | 35,000 70,000          | 25,000 49,000         |
| $C_{HH}$ | 75,000 150,000         | 47,000 93,000          | 33,000 64,000          | 24,000 49,000         |
| $C_W$    | <b>290,000 590,000</b> | <b>170,000 350,000</b> | <b>110,000 220,000</b> | <b>81,000 160,000</b> |

The entries for overfishing, deforestation, mangrove loss, and agriculture are in 2005 US\$, whereas all entries in Table 1 are in 2005 international \$. (To convert entries in US\$ to international \$, multiply  $C_{aL}$ ,  $C_{aM}$ , and  $C_{aH}$  by 4.3, 2.7, and 0.99, respectively.) For overfishing, the totals, rather than the net foregone revenues as in Tables 1 and 2, are given here (net/total = 0.16). The external costs associated with deforestation are allocated according to the consumption of agricultural and wood-based goods, equally weighted. Lower and upper bounds are separated by “|” where calculated. We also provide ozone layer impacts in disability-adjusted life years (DALYs).
