# Supplementary material
Source: PubMed Central journal article supplement (PMC2234219)
Supplement: pnas_0709562104_3.pdf [file pnas_0709562104_3.pdf]

**Table 4. Distributed costs  $C_{ab}$  with  $\varepsilon$ , the elasticity of the marginal utility of income, set to 1 for equity weighting**

|                                            | Direct or indirect driver considered here                                           | Income group $b$ | Income group $a$ (2005 international \$ $\times 10^9$ ) |                 |              |                        |
|--------------------------------------------|-------------------------------------------------------------------------------------|------------------|---------------------------------------------------------|-----------------|--------------|------------------------|
|                                            |                                                                                     |                  | Low                                                     | Middle          | High         | World                  |
| Climate change                             | Emissions of greenhouse gases carbon dioxide, methane, and nitrous oxide            | Low              | (210)–3,100                                             | (2,200)–1,900   | (53)–180     | (2,500)–5,200          |
|                                            |                                                                                     | Middle           | (710)–11,000                                            | (7,300)–6,300   | (180)–620    | (8,400)–17,000         |
|                                            |                                                                                     | High             | (670)–9,900                                             | (6,800)–5,900   | (170)–580    | (7,900)–16,000         |
|                                            |                                                                                     | World            | (1,600)–24,000                                          | (16,000)–14,000 | (400)–1,400  | <b>(18,000)–39,000</b> |
| Agricultural intensification and expansion | Consumption of agricultural goods                                                   | Low              | 9,000                                                   | 44              | 1.4–4.7      | 9,000                  |
|                                            |                                                                                     | Middle           | 57                                                      | 24,000          | 15–50        | 24,000                 |
|                                            |                                                                                     | High             | 130                                                     | 950             | 250–860      | 1,300–1,900            |
|                                            |                                                                                     | World            | 9,100                                                   | 25,000          | 270–920      | <b>34,000–35,000</b>   |
| Stratospheric ozone-layer depletion        | Emissions of chlorofluorocarbons                                                    | Low              | 2.5–5.6                                                 | 8.6–16          | 4.3–6.8      | 15–28                  |
|                                            |                                                                                     | Middle           | 44–98                                                   | 150–280         | 76–120       | 270–500                |
|                                            |                                                                                     | High             | 110–240                                                 | 380–700         | 190–300      | 680–1,200              |
|                                            |                                                                                     | World            | 160–350                                                 | 540–1,000       | 270–430      | <b>970–1,800</b>       |
| Deforestation                              | Consumption of agricultural goods and wood and wood-related goods, weighted equally | Low              | 1,300–6,700                                             | 0.44–7.9        | -            | 1,300–6,700            |
|                                            |                                                                                     | Middle           | 25–130                                                  | 300–5,300       | -            | 330–5,400              |
|                                            |                                                                                     | High             | 31–160                                                  | 20–360          | (4.9)        | 47–520                 |
|                                            |                                                                                     | World            | 1,400–6,900                                             | 320–5,700       | (4.9)        | <b>1,700–13,000</b>    |
| Overfishing                                | Consumption of fish and fisheries products                                          | Low              | 0.11–0.26                                               | 0.047–0.15      | 0.0025–0.012 | 0.16–0.42              |
|                                            |                                                                                     | Middle           | 2.2–6.8                                                 | 110–350         | 0.24–1.2     | 110–350                |
|                                            |                                                                                     | High             | 5.3–9.7                                                 | 19–59           | 1.2–6.0      | 26–75                  |
|                                            |                                                                                     | World            | 7.6–17                                                  | 120–400         | 1.5–7.1      | <b>130–430</b>         |
| Mangrove                                   | Consumption of farmed                                                               | Low              | 170                                                     | 0.30            | 0.00062      | 170                    |

|               |        |        |               |               |           |                |
|---------------|--------|--------|---------------|---------------|-----------|----------------|
| Loss          | shrimp | Middle | 6.5           | 150           | 0.063     | 150            |
|               |        | High   | 150           | 120           | 2.7       | 260            |
|               |        | World  | 320           | 260           | 2.7       | <b>590</b>     |
| <b>Totals</b> |        |        |               |               |           |                |
|               |        | Low    | 10,000–19,000 | (2,100)–1,900 | (48)–220  | 8,000–21,000   |
|               |        | Middle | (580)–10,000  | 17,000–36,000 | (87)–880  | 16,000–47,000  |
|               |        | High   | (250)–9,600   | (5,300)–8,000 | 280–1,800 | (5,600)–19,000 |
|               |        | World  | 9,400–38,000  | 9,800–46,000  | 140–2,900 | 19,000–87,000  |
