# Supplementary material
Source: PubMed Central journal article supplement (PMC2234219)
Supplement: pnas_0709562104_5.pdf [file pnas_0709562104_5.pdf]

**Table 6. For the overfishing analysis, the list of species with normalized catch  $\leq 0.3$  for at least 10 yr in succession or 15 yr total over 1961–2000, and lower and upper assignments of MSY as a percentage of maximum catch  $C_{\max}$  in that time period**

| Species                             | $t_{\max}$ | $t_m$ | Lower MSY, % | Upper MSY, % |
|-------------------------------------|------------|-------|--------------|--------------|
| <i>Anarhichas lupus</i>             | 26.2       | 5.5   | 5            | 10           |
| <i>Boreogadus saida</i>             | 7          | 2–5   | 20           | 40           |
| <i>Brevoortia tyrannus</i>          | 8.4        | 2.1   | 20           | 40           |
| <i>Chaenocephalus aceratus</i>      | 16.9       | 3.8   | 5            | 10           |
| <i>Chaenodraco wilsoni</i>          | 9.8        | 2.4   | 20           | 40           |
| <i>Champscephalus gunnari</i>       | 13         | 4     | 10           | 20           |
| <i>Clupea harengus</i>              | 25         | 2–5   | 30           | 66           |
| <i>Clupea pallasii</i>              | 19         | 1.4   | 30           | 60           |
| <i>Clupeonella cultriventris</i>    | 11.7       | 3.3   | 20           | 40           |
| <i>Coryphaenoides rupestris</i>     | 54         | 9–11  | 0            | 0            |
| <i>Decapterus maruadsi</i>          | 3          | 0.8   | 30           | 60           |
| <i>Dentex angolensis</i>            | 7          | –     | 20           | 40           |
| <i>Electrona carlsbergi</i>         | 5.1        | 1.6   | 20           | 40           |
| <i>Engraulis capensis</i>           | 4          | 1     | 30           | 60           |
| <i>Engraulis mordax</i>             | 7          | 1–4   | 20           | 40           |
| <i>Engraulis ringens</i>            | 3          | 1     | 30           | 60           |
| <i>Euphausia superba</i>            | 6–7        | 2–3   | 30           | 60           |
| <i>Euthynnus alletteratus</i>       | 8          | 2     | 20           | 40           |
| <i>Gadus morhua</i>                 | 15.2       | 3.1   | 10           | 49           |
| <i>Glyptocephalus cynoglossus</i>   | 25         | –     | 5            | 39           |
| <i>Gobionotothen gibberifrons</i>   | 41         | 9.7   | 0            | 0            |
| <i>Hippoglossoides platessoides</i> | 30         | 2–11  | 5            | 25           |
| <i>Hippoglossus hippoglossus</i>    | 50         | –     | 0            | 0            |
| <i>Hippoglossus stenolepis</i>      | 57.9       | 11.1  | 0            | 0            |
| <i>Illex illecebrosus</i>           | 1          | –     | 30           | 60           |
| <i>Jasus lalandii</i> *             | 10         | –     | 20           | 40           |
| <i>Lepidonotothen squamifrons</i>   | 19         | 7–9   | 5            | 10           |
| <i>Limanda aspera</i>               | 19         | 4.5   | 5            | 10           |
| <i>Makaira mazara</i>               | 28         | 4     | 5            | 10           |
| <i>Mallotus villosus</i>            | 5          | 3     | 30           | 60           |
| <i>Melanogrammus aeglefinus</i>     | 20         | 2–5   | 5            | 25           |
| <i>Merlangius merlangus</i>         | 20         | 2–4   | 5            | 10           |
| <i>Merluccius bilinearis</i>        | 12         | 2–3   | 10           | 20           |
| <i>Merluccius gayi peruanus</i>     | 13         | –     | 10           | 20           |

|                                       |       |       |    |    |
|---------------------------------------|-------|-------|----|----|
| <i>Merluccius hubbsi</i> <sup>†</sup> | –     | 6     | 10 | 20 |
| <i>Merluccius merluccius</i>          | 20    | 2–8   | 5  | 10 |
| <i>Micromesistius australis</i>       | 30    | 2–5   | 5  | 10 |
| <i>Micromesistius poutassou</i>       | 20    | 1–5   | 5  | 10 |
| <i>Nemadactylus bergi</i>             | –     | 2     | 20 | 40 |
| <i>Notothenia rossii</i>              | 16    | –     | 5  | 10 |
| <i>Oncorhynchus gorbuscha</i>         | 3     | 2     | 30 | 60 |
| <i>Oncorhynchus keta</i>              | 6     | 2–5   | 20 | 40 |
| <i>Oncorhynchus nerka</i>             | 7     | 2–4   | 20 | 40 |
| <i>Osmerus eperlanus</i>              | 10    | 2–4   | 20 | 40 |
| <i>Ostrea lutaria</i> <sup>‡</sup>    | 6     | –     | 20 | 40 |
| <i>Paralithodes camtschaticus</i>     | 20–30 | –     | 5  | 10 |
| <i>Parastromateus niger</i>           | 10.6  | 2.4   | 10 | 20 |
| <i>Patagonotothen brevicauda</i>      | 8.8   | 2.4   | 20 | 40 |
| <i>Perna viridis</i>                  | 2–3   | –     | 30 | 60 |
| <i>Pleuragramma antarcticum</i>       | 20    | 3–4   | 5  | 10 |
| <i>Pollachius virens</i>              | 16.9  | 3.6   | 5  | 33 |
| <i>Pomatomus saltator</i>             | 9     | 2     | 20 | 40 |
| <i>Pseudochaenichthys georgianus</i>  | 12    | 4     | 10 | 20 |
| <i>Reinhardtius hippoglossoides</i>   | 30    | 7–12  | 5  | 10 |
| <i>Sarda chiliensis chiliensis</i>    | –     | 2     | 30 | 60 |
| <i>Sarda sarda</i>                    | 5     | 1     | 30 | 60 |
| <i>Sardina pilchardus</i>             | 5.8   | 1.6   | 20 | 40 |
| <i>Sardinops sagax</i>                | 6.6   | 1.7   | 30 | 60 |
| <i>Scomber japonicus</i>              | 18    | 2–3   | 5  | 10 |
| <i>Scomber scombrus</i>               | 17    | 2–3   | 5  | 67 |
| <i>Sebastes alutus</i>                | 100   | –     | 0  | 23 |
| <i>Sebastes marinus</i>               | 60    | 10–12 | 0  | 23 |
| <i>Stephanolepis cirrhifer</i>        | 8.8   | 2.4   | 20 | 40 |
| <i>Tetrapturus audax</i>              | 9     | 2–3   | 20 | 40 |
| <i>Theragra chalcogramma</i>          | 22.1  | 4.9   | 5  | 10 |
| <i>Thunnus alalunga</i>               | 10    | 4–6   | 20 | 40 |
| <i>Thunnus albacares</i>              | 8     | 2–5   | 20 | 40 |
| <i>Thunnus maccoyii</i>               | 20    | 8–9   | 5  | 10 |
| <i>Thunnus thynnus</i>                | 15    | 3–5   | 10 | 20 |
| <i>Thyrsites atun</i>                 | 10    | 2–4   | 20 | 40 |
| <i>Todarodes pacificus</i>            | 1     | 0     | 30 | 60 |
| <i>Trachurus declivis</i>             | 25    | 2–4   | 5  | 10 |
| <i>Trachurus japonicus</i>            | 6     | –     | 20 | 40 |

|                                |      |     |    |    |
|--------------------------------|------|-----|----|----|
| <i>Trachurus mediterraneus</i> | 12   | –   | 10 | 20 |
| <i>Trachurus trachurus</i>     | 11   | 2–3 | 10 | 20 |
| <i>Trachurus trecae</i>        | 11   | 2.6 | 10 | 20 |
| <i>Trematomus eulepidotus</i>  | 12.9 | 3.2 | 10 | 20 |

A dash indicates that we did not find data for the species. Upper values shown in italics are derived from data from the NOAA's Northeast Fisheries Science Center (NEFSC, [www.nefsc.noaa.gov/sos/](http://www.nefsc.noaa.gov/sos/)).

\*For most species in the genus *Jasus*, the maximum lifespan is unknown, but laboratory-raised *J. lalandii* have lived up to 10 yr (1).

†Low resilience, minimum population doubling time 4.5–14 yr (2).

‡Medium resilience, minimum population doubling time 1.4–4.4 yr (2).

1. Bliss D (1982) *Shrimps, Lobsters, and Crabs* (New Century, Piscataway, NJ).
2. Froese R, Pauly D (2006) FishBase, [www.fishbase.net](http://www.fishbase.net).
