# Supplementary material
Source: PubMed Central journal article supplement (PMC2234219)
Supplement: pnas_0709562104_6.pdf [file pnas_0709562104_6.pdf]

**Table 7. For the overfishing analysis, formulas used to calculate the distribution  $C_{ab}$  of the foregone catch “borne” by each of the three income groups  $b$  as external costs of consumption by each group  $a$**

|                                        |        | Bearers of foregone catch                                      |                                                                |                                                                |
|----------------------------------------|--------|----------------------------------------------------------------|----------------------------------------------------------------|----------------------------------------------------------------|
|                                        |        | Low                                                            | Middle                                                         | High                                                           |
| Consumers of fish and fishery products | Low    | $F_{LL} (1 - \ell_{L \rightarrow M} - \ell_{L \rightarrow H})$ | $\sum_{a=L,M,H} F_{aM} \ell_{a \rightarrow L}$                 | $\sum_{a=L,M,H} F_{aH} \ell_{a \rightarrow L}$                 |
|                                        | Middle | $\sum_{a=L,M,H} F_{aL} \ell_{a \rightarrow M}$                 | $F_{MM} (1 - \ell_{M \rightarrow L} - \ell_{M \rightarrow H})$ | $\sum_{a=L,M,H} F_{aH} \ell_{a \rightarrow M}$                 |
|                                        | High   | $\sum_{a=L,M,H} F_{aL} \ell_{a \rightarrow H}$                 | $\sum_{a=L,M,H} F_{aM} \ell_{a \rightarrow H}$                 | $F_{HH} (1 - \ell_{H \rightarrow L} - \ell_{H \rightarrow M})$ |
