# Supplementary material
Source: PubMed Central journal article supplement (PMC2234219)
Supplement: pnas_0709562104_7.pdf [file pnas_0709562104_7.pdf]

**Table 8. Formulas used in the deforestation, mangrove loss, and agricultural analyses to calculate the distribution  $C_{ab}$  of the local damages borne by each of the three income groups  $b$  as external costs of consumption by each group  $a$**

|                                            |        | Bearers of external costs from loss of local forest services |                                                      |                                                      |
|--------------------------------------------|--------|--------------------------------------------------------------|------------------------------------------------------|------------------------------------------------------|
|                                            |        | Low                                                          | Middle                                               | High                                                 |
| Consumers of wood or agricultural products | Low    | $D_L(1 - e_{L \rightarrow M} - e_{L \rightarrow H})$         | $D_M(e_{M \rightarrow L})$                           | $D_H(e_{H \rightarrow L})$                           |
|                                            | Middle | $D_L(e_{L \rightarrow M})$                                   | $D_M(1 - e_{M \rightarrow L} - e_{M \rightarrow H})$ | $D_H(e_{H \rightarrow M})$                           |
|                                            | High   | $D_L(e_{L \rightarrow H})$                                   | $D_M(e_{M \rightarrow H})$                           | $D_H(1 - e_{H \rightarrow L} - e_{H \rightarrow M})$ |
