# Supplementary material
Source: PubMed Central journal article supplement (PMC2234219)

normalized catch

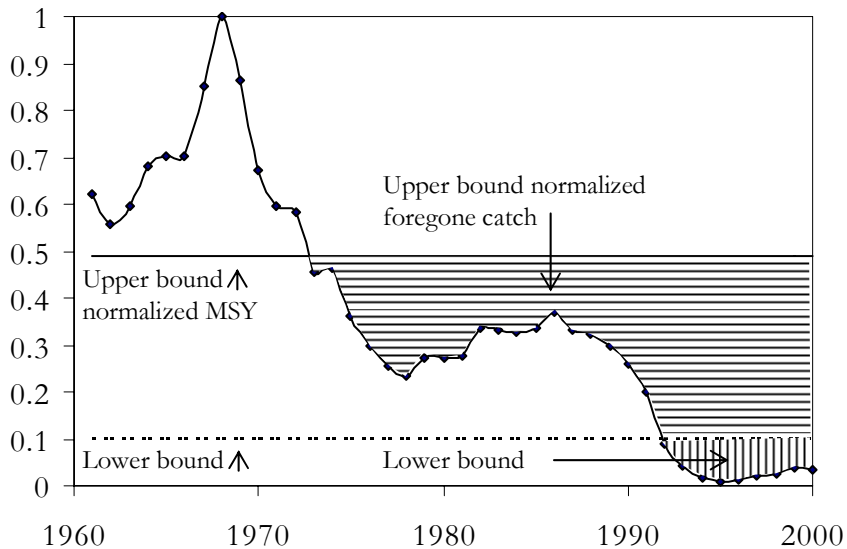

Supplement: pnas_0709562104_1.pdf [file pnas_0709562104_1.pdf]
